# Supplementary material for: Brown Algae-Derived Fucoidan Exerts Oxidative Stress-Dependent Antiproliferation on Oral Cancer Cells
Source: MDPI journal article supplement (doi:10.3390/antiox11050841), 2022-04-26
Supplement: s1 [file s1]

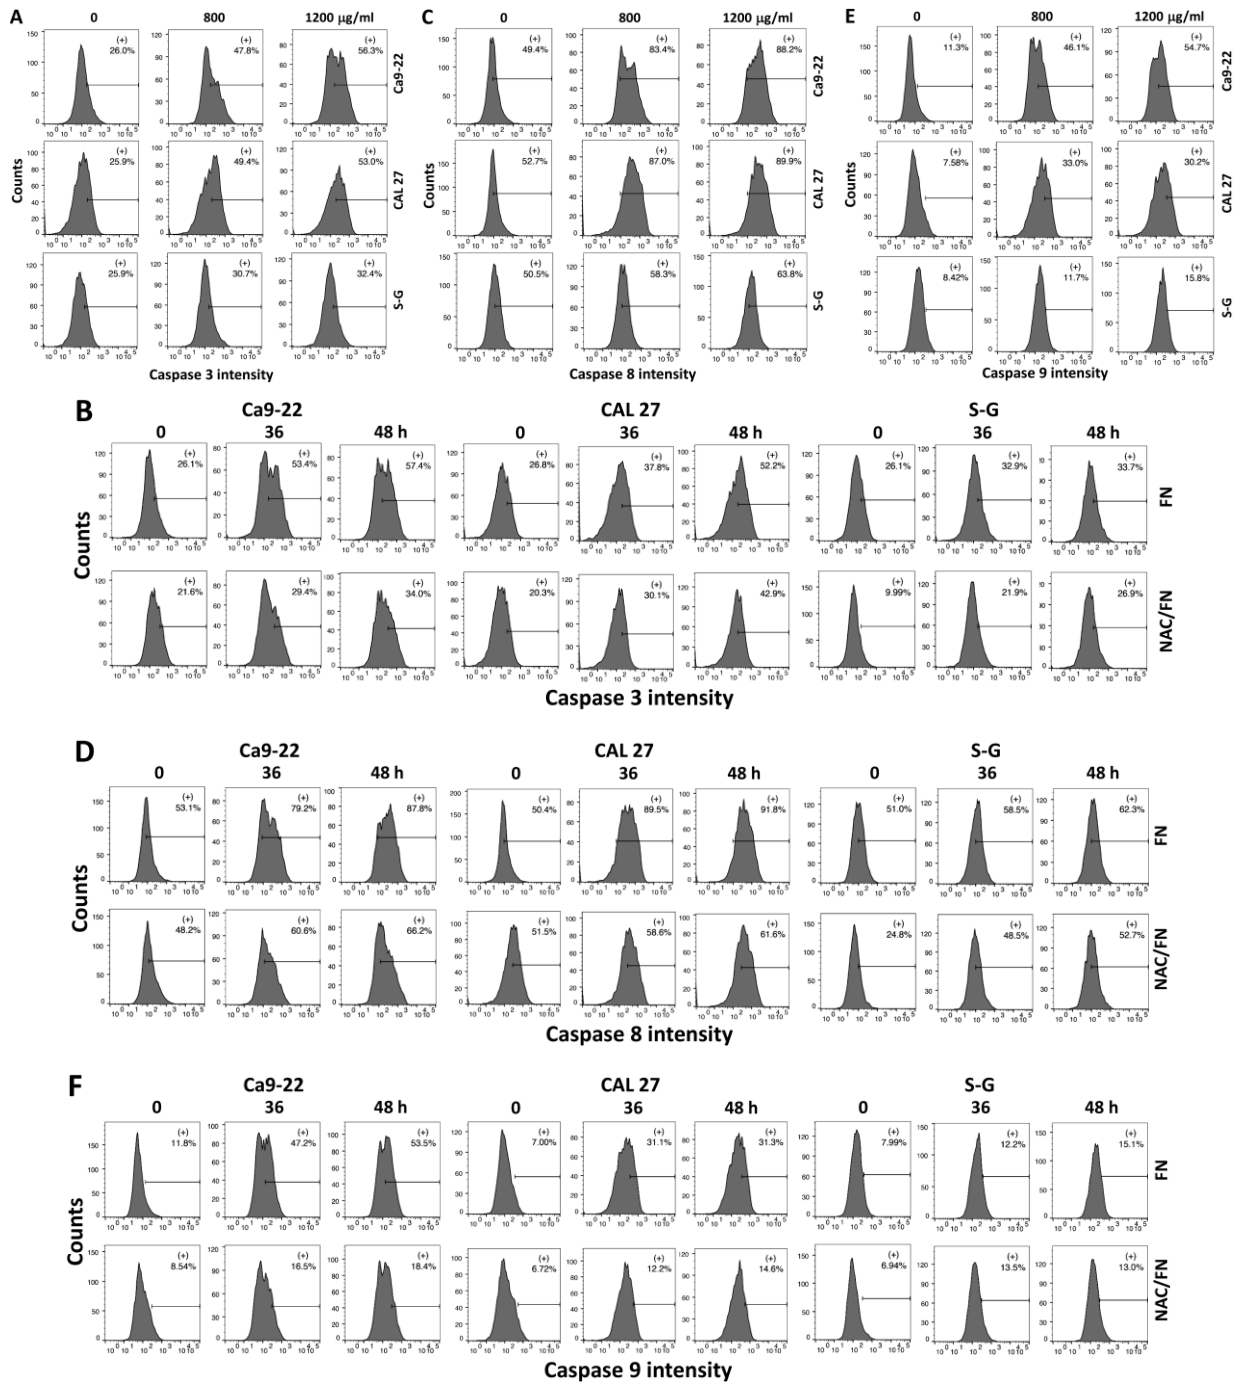

**Figure S1.** Fucoidan drives Cas 3, 8, and 9 signaling in oral cancer cells. (**A**, **C**, and **E**) Cas 3, 8, and 9 flow cytometry density plots. Oral cancer (Ca9-22 and CAL 27) and non-malignant cells (S-G) were treated with fucoidan (control, 800, and 1200 µg/ml) for 0 and 48 h. (+) indicates a high level of Cas 3, 8, and 9. (**B**, **D**, and **F**). The effect of oxidative stress on Cas 3, 8, 9 activations of fucoidan-incubated oral cancer cells. After NAC incubation or not, cells were treated with fucoidan (1200 µg/ml) for 0, 36, and 48 h. These are flow cytometry density plots for Figure 4. In general, the actual setting for the windows in (**A**, **C**, and **E**) is based on similar (+) (%) of the controls between different cell lines. For NAC pretreatment, the actual setting for the windows in (**B**, **D**, and **F**) is based on the same caspase intensity of the controls between different cell lines.

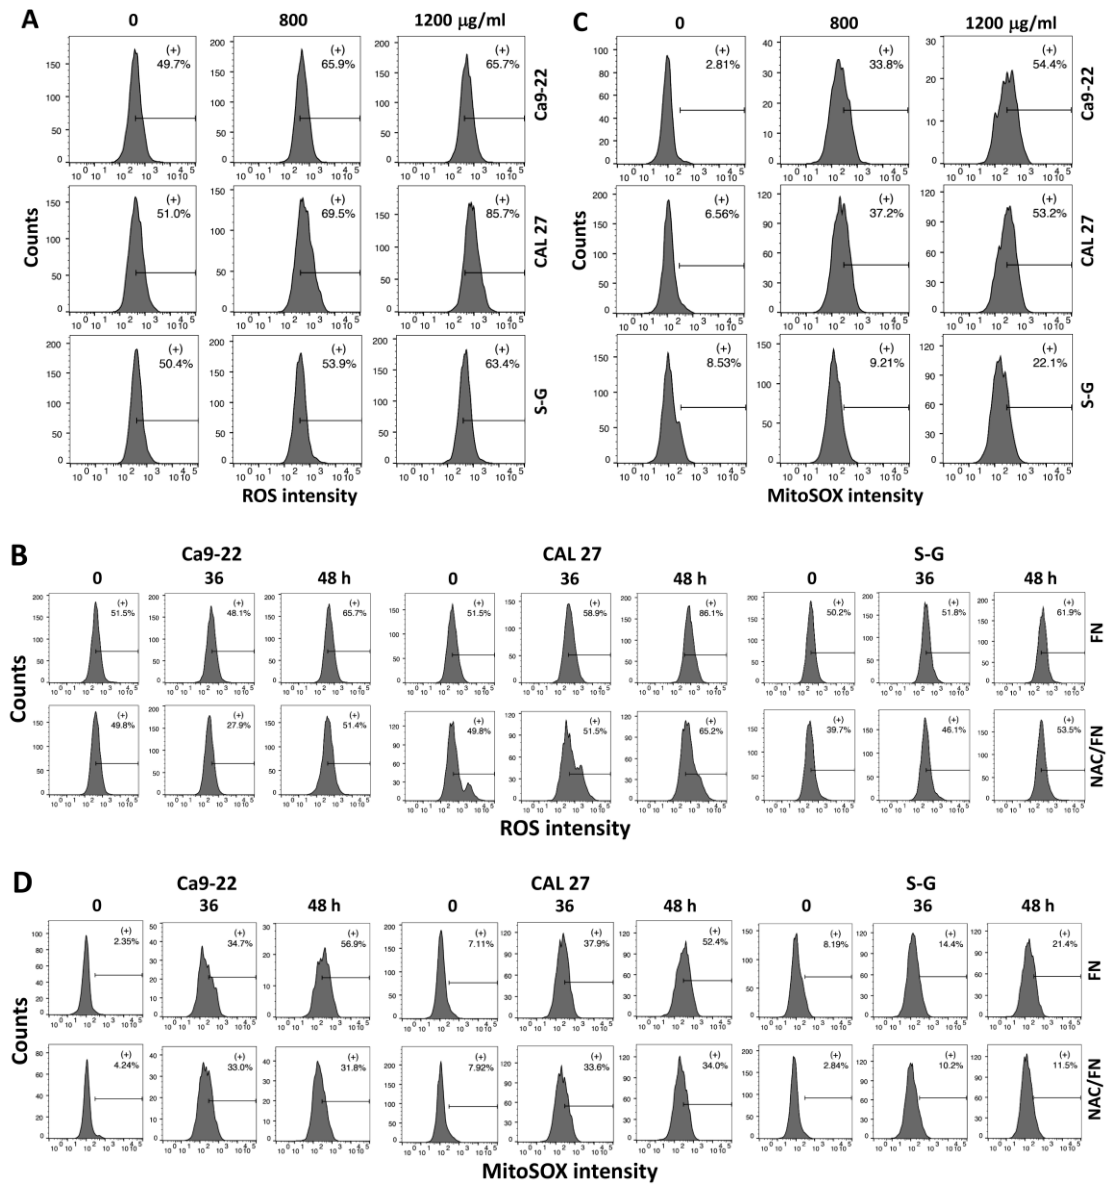

**Figure S2.** Fucoidan drives ROS and MitoSOX generation in oral cancer cells. (A and C) ROS and MitoSOX flow cytometry density plots. Oral cancer (Ca9-22 and CAL 27) and non-malignant cells (S-G) were treated with fucoidan (control, 800, and 1200 µg/ml) for 0 and 48 h. (+) indicates high levels of ROS and MitoSOX. (B and D) The effect of oxidative stress on ROS and MitoSOX generation and the GSH depletion of fucoidan-incubated oral cancer cells. After NAC incubation or not, cells were treated with fucoidan (1200 µg/ml) for 0, 36, and 48 h. These are flow cytometry density plots for Figure 5. In general, the actual setting for the windows in (A and C) is based on similar (+) (%) of the controls between different cell lines. For NAC pretreatment, the actual setting for the windows in (B and D) is based on the same ROS or MitoSOX intensity of the controls between different cell lines.

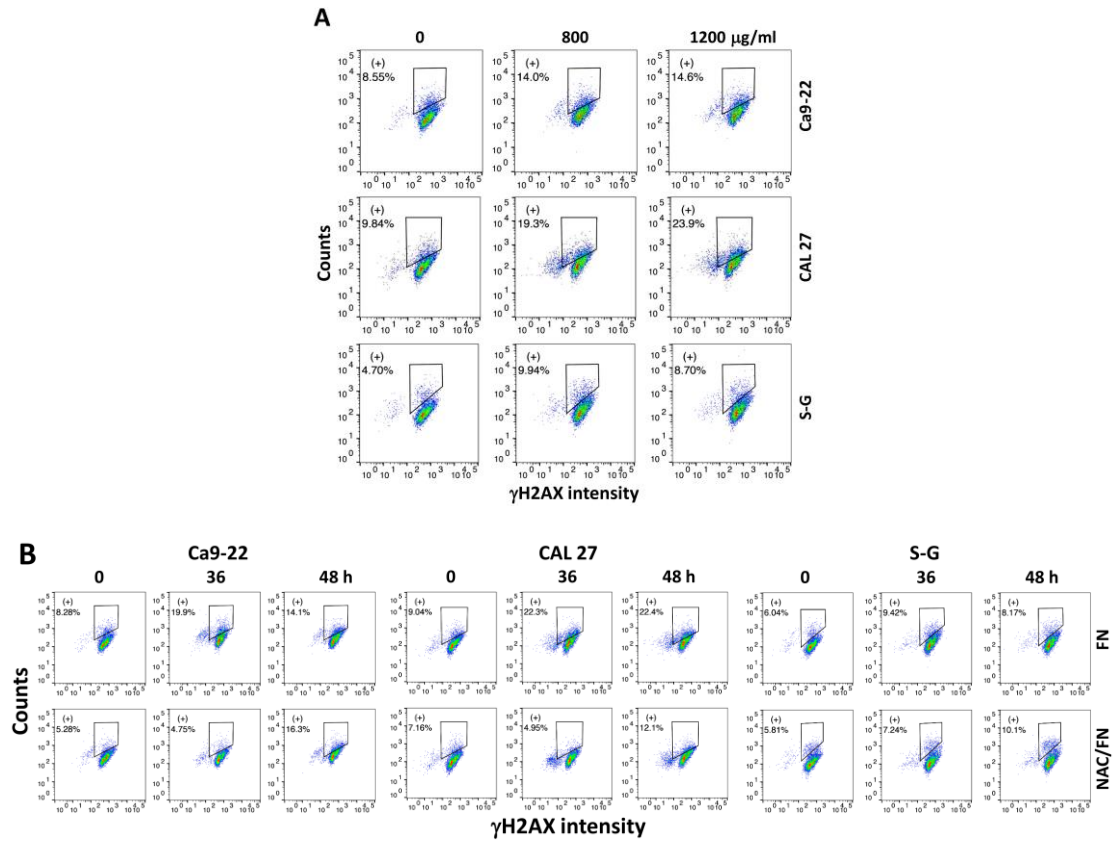

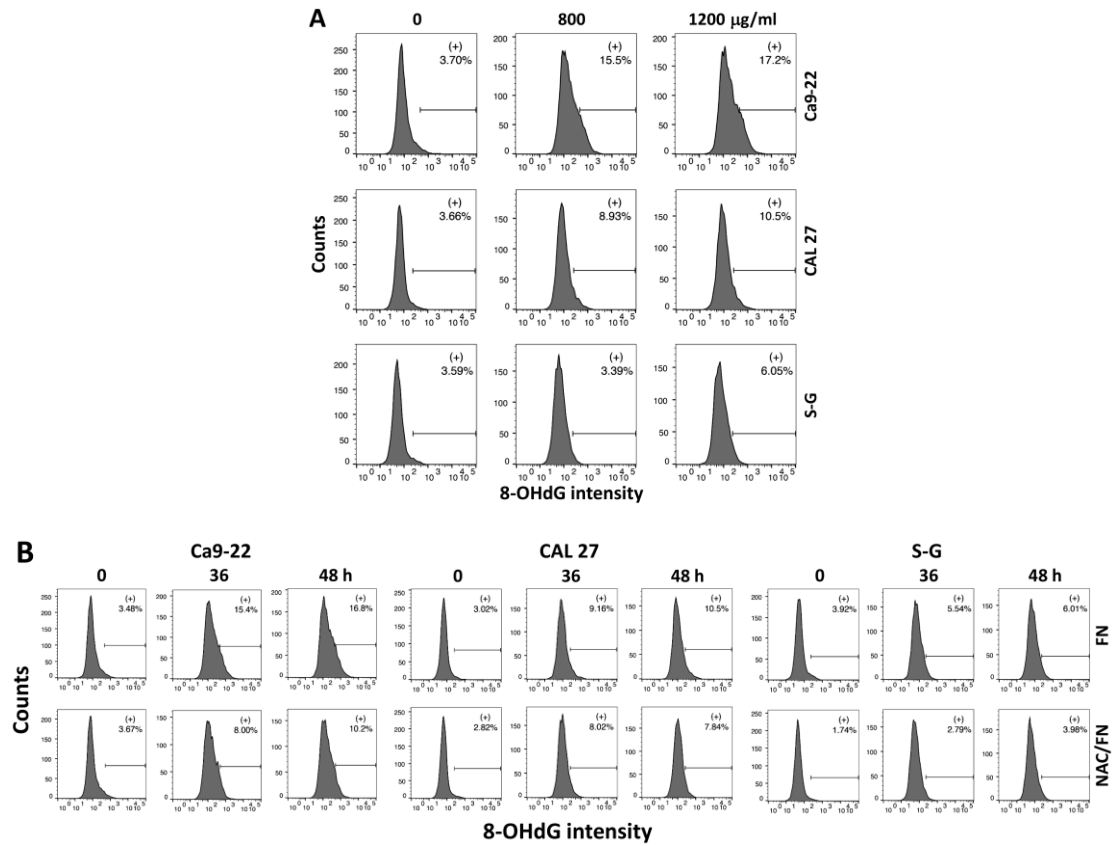

**Figure S4.** Fucoidan increases the 8-OHdG level of oral cancer cells. **(A)** 8-OHdG flow cytometry density plots. Oral cancer (Ca9-22 and CAL 27) and non-malignant cells (S-G) were treated with fucoidan (control, 800, and 1200 µg/ml) for 0 and 48 h. (+) indicates a high level of 8-OHdG. **(B)** The effect of oxidative stress on the 8-OHdG increment in fucoidan-incubated oral cancer cells. After NAC incubation or not, cells were treated with fucoidan (1200 µg/ml) for 0, 36, and 48 h. These are flow cytometry density plots for Figure 9. In general, the actual setting for the windows in **(A)** is based on similar (+) (%) of the controls between different cell lines. For NAC pretreatment, the actual setting for the windows in **(B)** is based on the same 8-OHdG intensity of the controls between different cell lines.

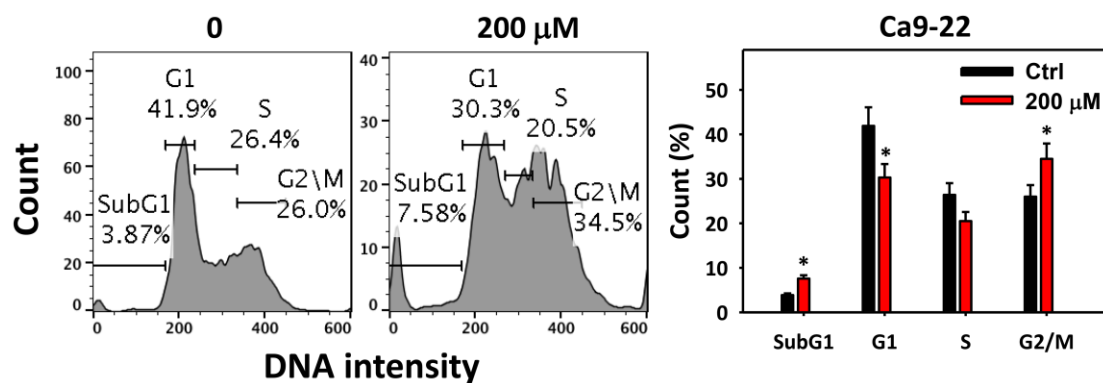

**Figure S5.** Positive control patterns for cell cycle analysis. Flow cytometry density plots and summary statistics were shown. Cells (Ca9-22) were treated with  $\text{H}_2\text{O}_2$  (200  $\mu\text{M}$ ) for 24 h. \* indicate  $P < 0.05$  ( $t$ -test). Data = mean  $\pm$  SD ( $n = 3$ ).

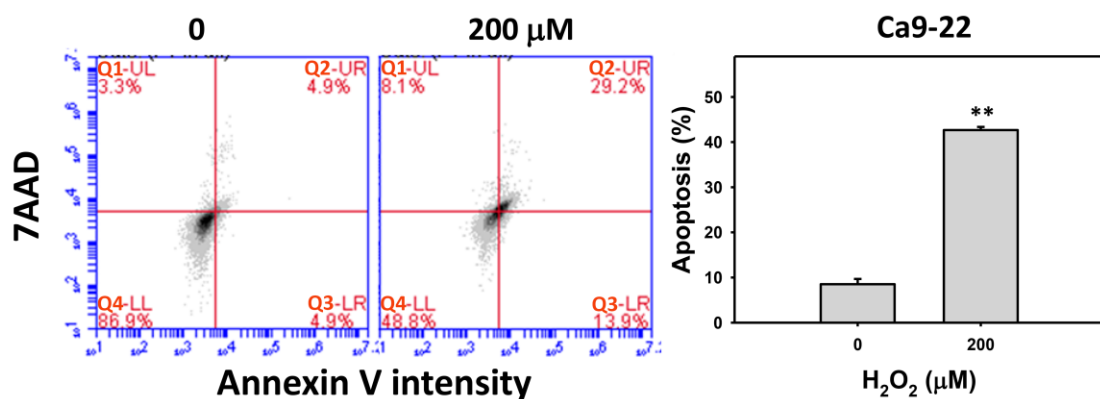

**Figure S6.** Positive control patterns for apoptosis. Flow cytometry density plots and summary statistics were shown. Cells (Ca9-22) were treated with  $\text{H}_2\text{O}_2$  (200  $\mu\text{M}$ ) for 24 h. \*\* indicates  $P < 0.01$  ( $t$ -test). Data = mean  $\pm$  SD ( $n = 3$ ).

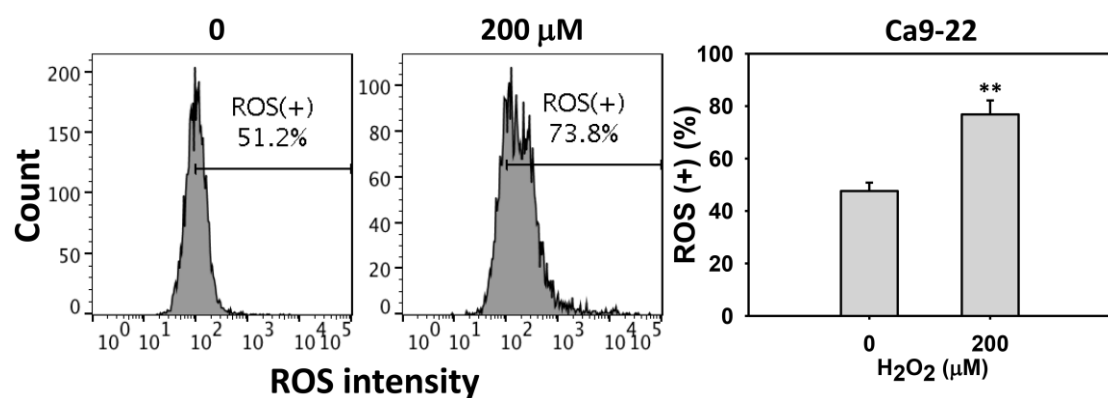

**Figure S7.** Positive control patterns for ROS analysis. Flow cytometry density plots and summary statistics were shown. Cells (Ca9-22) were treated with  $\text{H}_2\text{O}_2$  (200  $\mu\text{M}$ ) for 24 h. \*\* indicates  $P < 0.01$  ( $t$ -test). Data = mean  $\pm$  SD ( $n = 3$ ).

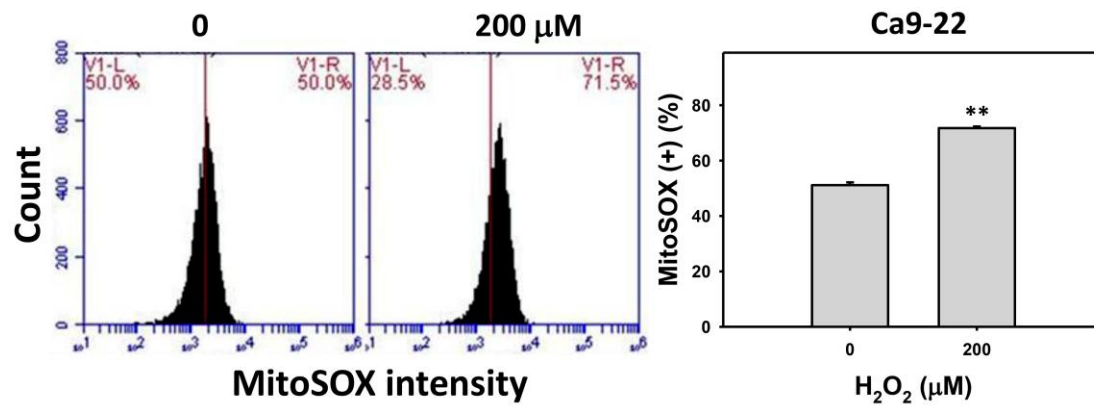

**Figure S8.** Positive control patterns for MitoSOX analysis. Flow cytometry density plots and summary statistics were shown. Cells (Ca9-22) were treated with H<sub>2</sub>O<sub>2</sub> (200 μM) for 24 h. \*\* indicates  $P < 0.01$  ( $t$ -test). Data = mean  $\pm$  SD ( $n = 3$ ).

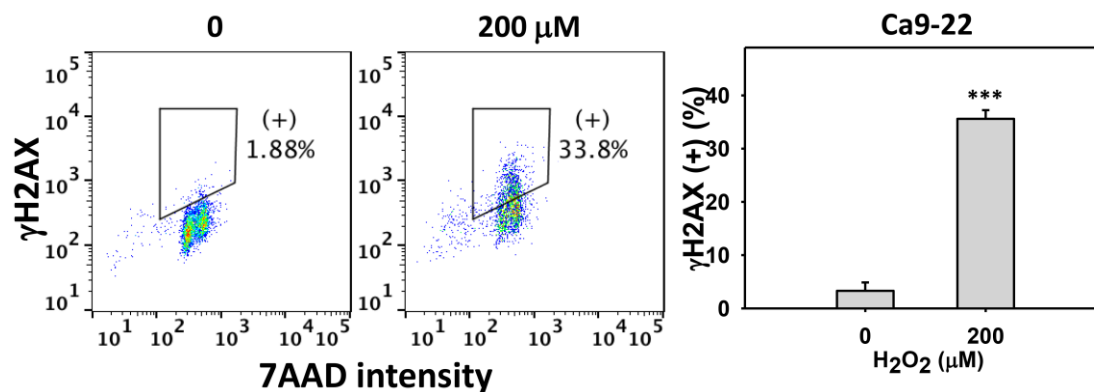

**Figure S9.** Positive control patterns for  $\gamma$ H2AX analysis. Flow cytometry density plots and summary statistics were shown. Cells (Ca9-22) were treated with H<sub>2</sub>O<sub>2</sub> (200 μM) for 24 h. \*\*\* indicates  $P < 0.001$  ( $t$ -test). Data = mean  $\pm$  SD ( $n = 3$ ).

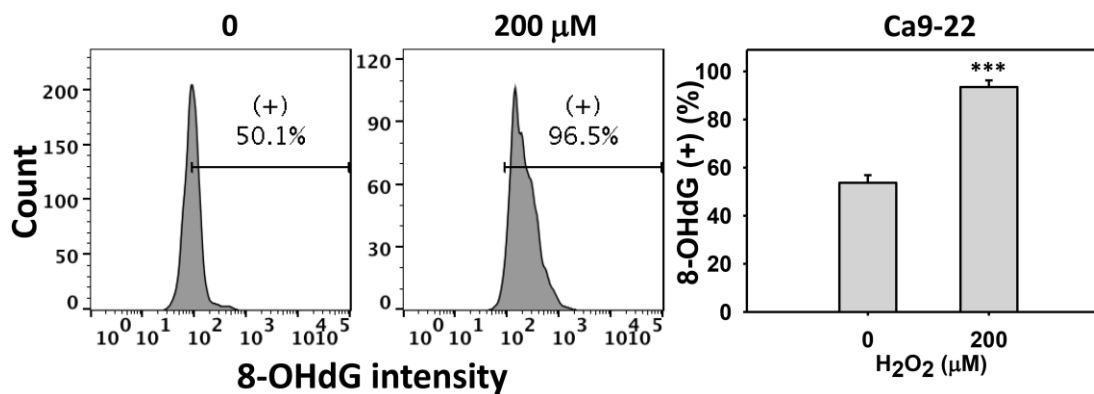

**Figure S10.** Positive control patterns for 8-OHdG analysis. Flow cytometry density plots and summary statistics were shown. Cells (Ca9-22) were treated with H<sub>2</sub>O<sub>2</sub> (200 μM) for 24 h. \*\*\* indicates  $P < 0.01$  ( $t$ -test). Data = mean  $\pm$  SD ( $n = 3$ ).
